# Supplementary material
Source: PubMed Central journal article supplement (PMC4120662)
Supplement: NIHMS596872-supplement-Suppl_Material.pdf [file NIHMS596872-supplement-Suppl_Material.pdf]

*Supplementary Materials for Lyddon R, Dwork A J, Keddache M, Siever L J, Dracheva S. Serotonin 2c receptor RNA editing in major depression and suicide. The World Journal of Biological Psychiatry, 2013; 14:590–601.*

## Supplemental Methods

### *Analysis of 5-HT<sub>2C</sub>R Editing*

cDNA from each of the 101 subjects was used as a template to PCR-amplify the region that contains all 5 editing sites (region of editing). To minimize the influence of a possibly erroneous amplification in a single reaction, which could alter the proportions of differently edited mRNA variants, three independent PCRs were performed for each subject using forward (F)-GTGATCATGGCAGTAAGCATGGA and reverse (R)-ATCTTCATGATGGCCTTAGTCCG primer-pair and a touch-down cycling program, consisting of 10 min at 95° C; 10 cycles of 15 sec at 95° C, 30 sec at 68–59° C (annealing temperature was decreased 1° C after each cycle), and 30 sec at 72° C, followed by 35 cycles of 15 sec at 95° C, 30 sec at 58° C, and 30 sec at 72° C. The reverse primer was designed within the 95 bp region that contains all five editing sites and is deleted in the truncated mRNA splice variant 5-HT<sub>2C</sub>Rsp1 (see below) (Dracheva et al. 2003; Flomen et al. 2004; Dracheva et al. 2008); therefore, only the full-length 5-HT<sub>2C</sub>R transcript (5-HT<sub>2C</sub>Rsp2) that encodes a full-length receptor was amplified using this primer pair. The PCR products of the three independent reactions generated for each subject were combined and resolved by gel electrophoresis. A single DNA band of the expected size (~305bp) was detected for each subject. The fragment was gel-purified using a Min-Elute gel extraction kit (Qiagen) and analyzed using Next Generation Sequencing.

### *Next Generation Sequencing (NGS)*

The purified PCR products generated from all 101 individuals were subjected to NGS on the Illumina platform. Next generation multiplex sequencing libraries compatible with the Illumina GAIIx system were prepared from each PCR product with the following modifications from the manufacturer's recommendations: (1) the volume of the end repair step was scaled down from 100 to 25 µl; (2) the volumes of the 3' A-overhang addition and adapter ligation steps were scaled down from 50 to 25 µl; (3) the size selection step was eliminated because each template represented a PCR product and, therefore, had the same size. To reduce the cost, the number of indices was extended from 12-plex to 24-plex, thus allowing a simultaneous run of 24 different samples. This was achieved by synthesizing 12 additional molecular barcode oligonucleotides. To prevent wrong

assignments of reads, care was taken to ensure that all 24 barcode sequences were sufficiently different from each other. This was achieved by increasing the length of the molecular barcode from 6 to 8 nucleotides.

The five nucleotides that undergo editing (A, B, E, C and D sites) are closely spaced within 13 base pairs (bp) and are situated in the range of 47 to 59 bp from one of the ends of the PCR product. While these positions are within the reach of a read when the GAIIx system is used, raw error rates are still a concern at base positions over 50 bp from the end of a template. In addition, our method could not rely on alignment to a reference for a consensus error correction. To circumvent this problem, we modified the sequencing protocol. Specifically, custom sequencing primers that anneal within the PCR product were employed instead of a standard Illumina sequencing primer that anneals within the adapter. In addition, because the PCR fragments could be cloned in two different directions relative to the adapter, 2 primers were used to sequence the fragments oriented in the forward and reverse direction, respectively. This approach positioned the variable nucleotides no more than 24 bases away from a sequencing primer, thus minimizing the raw error rates. Cluster generation was performed using the multi-primer-hyb recipe and a pool of the 2 sequencing primers at 100 nM each. Sequencing was performed using a custom single-read-multiplex recipe collecting 27 bases on the primary read and 9 bases on the indexing read.

A PERL script was written to sort each sequence by its barcode, thus assigning it to its corresponding sample. Within each sample, the script counted the number of reads corresponding to each of the 32 expected mRNA variants as well as the percentage of each of the variants relative to the total number of reads obtained for the sample.

### *Gene Expression Analysis*

mRNA expression of 5-HT<sub>2C</sub>R and ADAR1&2, was measured by quantitative real-time PCR (qPCR) using ABI Prism 7900 Sequence Detector (Applied Biosystems) and TaqMan® gene-specific FAM/MGB assays (Applied Biosystems) as described (Dracheva et al. 2009). The reactions were run in triplicates for each sample and for each assay. To control for variation in the amount and quality of mRNA in each sample, expression levels of the target (5-HT<sub>2C</sub>R and ADAR1&2) transcripts were normalized to the

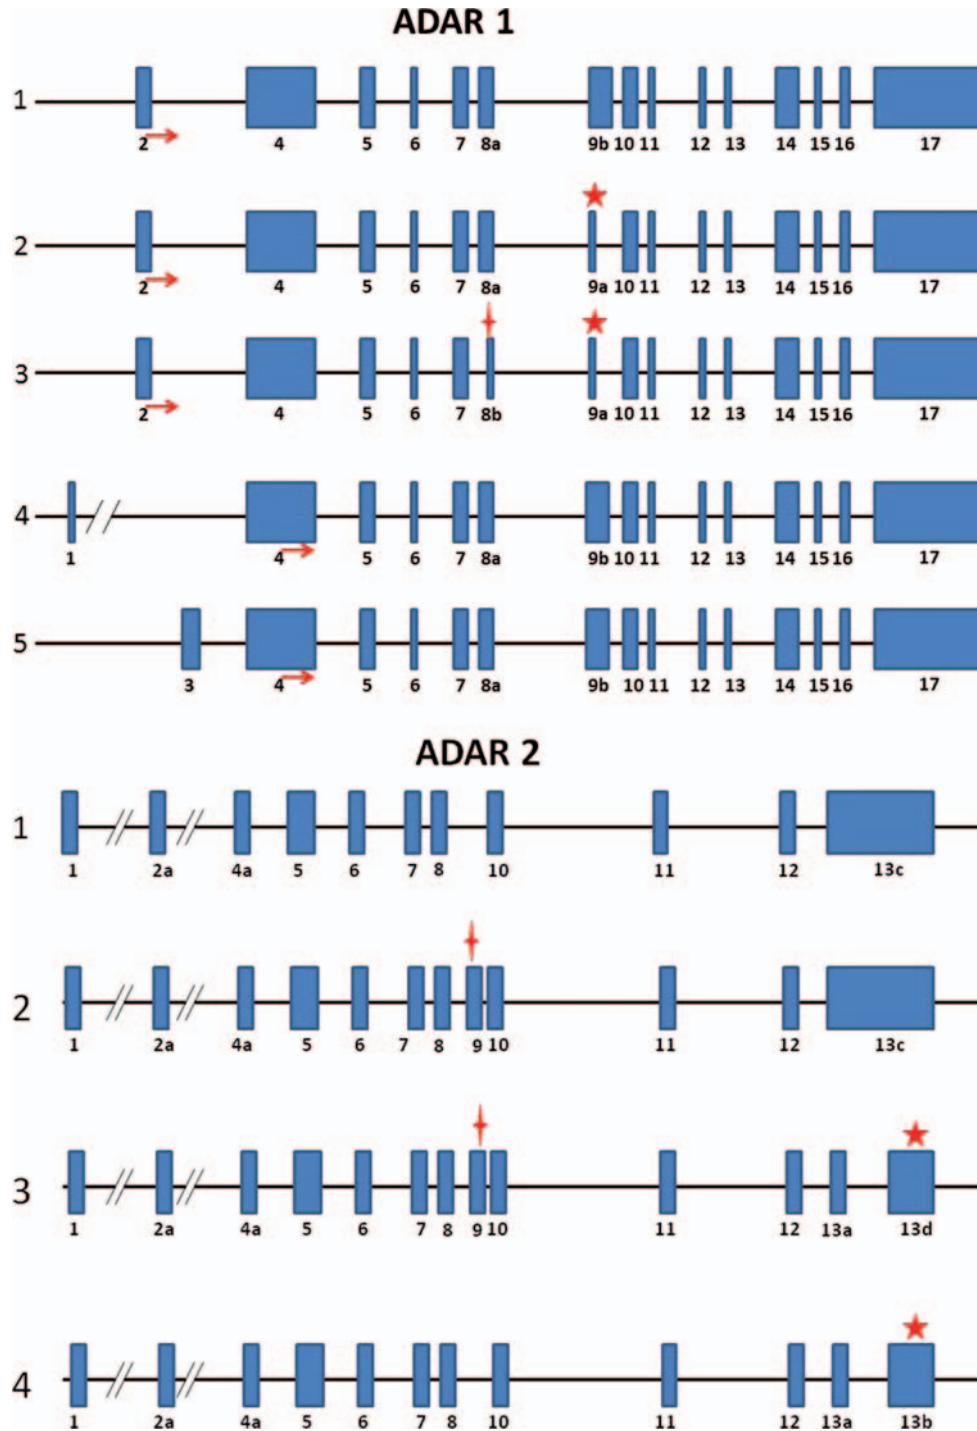

Supplemental Figure 1. Schematic representation of the five ADAR1 and four ADAR2 mRNA splice variants. ADAR1 transcripts vary: (1) in their first exon (exon 1, 2 or 3 in variants 4, 1-3, and 5 respectively) and, therefore their translational start codon (translational start and direction is indicated by red arrow) and (2) in the length of exon 8 and 9, where exon 8b (red diamond) in variant 3 and exon 9a (red star) in variants 2 & 3 represent shortened versions of those respective exons. ADAR2 transcripts vary: (1) in the presence of exon 9 in variants 2 & 3 (red diamonds) and (2) the length of exon 13, which is shortened in variants 3 & 4 (red stars). Schematics are not drawn to scale.

expression levels of five endogenous control genes (ECG) [ $\beta$ -2-microglobulin (*B2M*),  $\beta$ glucuronidase (*GUSB*), cyclophilin A (*PPLA*), hypoxanthine ribosyltransferase 1 (*HPRT1*), and large ribosomal protein (*RPLP0*)]. A touch-down thermal cycling

program was applied to amplify the 5-HT<sub>2C</sub>R transcripts. It consisted of 2 min at 50° C; 10 min at 95° C; 10 cycles of 15 sec at 95° C, 30 sec at 70-61° C (annealing temperature was decreased 1° C after each cycle), and 30 sec at 72° C, followed by

Supplementary Table 1. Demographic Information of the study cohort

| #                      | Co-hort     | Age | Sex | Race | PMI (hr) | pH   | Brain Weight (g) | COD         | Presc. Antidep. | Presc. Antipsy chotics | Other Prescr. Drugs | Drug abuse                  | Alcohol use      | Smoking | Toxicology    |
|------------------------|-------------|-----|-----|------|----------|------|------------------|-------------|-----------------|------------------------|---------------------|-----------------------------|------------------|---------|---------------|
| <b>NORMAL CONTROLS</b> |             |     |     |      |          |      |                  |             |                 |                        |                     |                             |                  |         |               |
| 1                      | SMRI: Array | 44  | F   | W    | 28       | 6.59 | 1330             | Cardiac     | None            | None                   | None                | None                        | Moderate present | Unknown | Not available |
| 2                      | SMRI: Array | 49  | M   | W    | 46       | 6.5  | 1605             | Cardiac     | None            | None                   | None                | None                        | Little or none   | No      | Not available |
| 3                      | SMRI: Array | 53  | M   | W    | 9        | 6.4  | 1500             | Cardiac     | None            | None                   | None                | None                        | Little or none   | Unknown | Not available |
| 4                      | SMRI: Array | 37  | M   | W    | 13       | 6.5  | 1600             | Cardiac     | None            | None                   | None                | None                        | Little or none   | Yes     | Not available |
| 5                      | SMRI: Array | 51  | M   | W    | 31       | 6.7  | 1400             | Cardiac     | None            | None                   | None                | None                        | Little or none   | No      | Not available |
| 6                      | SMRI: Array | 53  | M   | W    | 28       | 6    | 1340             | Cardiac     | None            | None                   | None                | None                        | Little or none   | Unknown | Not available |
| 7                      | SMRI: Array | 38  | F   | W    | 33       | 6    | 1120             | Cardiac     | None            | None                   | None                | None                        | Moderate present | Unknown | Not available |
| 8                      | SMRI: Array | 38  | F   | W    | 28       | 6.7  | 1350             | Cardiac     | None            | None                   | None                | None                        | Little or none   | Unknown | Not available |
| 9                      | SMRI: Array | 60  | M   | W    | 47       | 6.8  | 1460             | Cardiac     | None            | None                   | None                | None                        | Little or none   | Unknown | Not available |
| 10                     | SMRI: Array | 35  | M   | W    | 52       | 6.7  | 1700             | Myocarditis | None            | None                   | None                | None                        | Little or none   | Unknown | Not available |
| 11                     | SMRI: Array | 34  | M   | W    | 22       | 6.48 | 1480             | Cardiac     | None            | None                   | None                | None                        | Little or none   | Unknown | Not available |
| 12                     | SMRI: Array | 47  | M   | W    | 21       | 6.81 | 1550             | Cardiac     | None            | None                   | None                | None                        | Little or none   | Yes     | Not available |
| 13                     | SMRI: Array | 45  | M   | W    | 29       | 6.94 | 1405             | Cardiac     | None            | None                   | None                | None                        | Little or none   | Yes     | Not available |
| 14                     | SMRI: Array | 34  | F   | W    | 24       | 6.87 | 1255             | Cardiac     | None            | None                   | None                | None                        | Little or none   | Unknown | Not available |
| 15                     | SMRI: Array | 42  | M   | W    | 37       | 6.91 | 1340             | Cardiac     | None            | None                   | None                | moderate present (cannabis) | Heavy past       | Yes     | Not available |
| 16                     | SMRI: Array | 44  | F   | W    | 10       | 6.2  | 1305             | Cardiac     | None            | None                   | None                | None                        | Little or none   | No      | Not available |
| 17                     | SMRI: Array | 45  | M   | W    | 18       | 6.81 | 1585             | Cardiac     | None            | None                   | None                | None                        | Little or none   | No      | Not available |
| 18                     | SMRI: Array | 49  | M   | W    | 23       | 6.93 | 1390             | Cardiac     | None            | None                   | None                | None                        | Little or none   | No      | Not available |
| 19                     | SMRI: Array | 35  | M   | W    | 24       | 7.03 | 1415             | Cardiac     | None            | None                   | None                | None                        | Moderate past    | No      | Not available |
| 20                     | SMRI: Array | 55  | M   | W    | 31       | 6.7  | 1515             | Cardiac     | None            | None                   | None                | None                        | Little or none   | Yes     | Not available |

(Continued)

Supplementary Table 1. (continued)

| #  | Co-hort     | Age | Sex | Race | PMI (hr) | Brain Weight (g) | COD  | Presc. Antidep. | Presc. Antipsy chotics | Other Prescr. Drugs | Drug abuse | Alcohol use    | Smoking | Toxicology    |
|----|-------------|-----|-----|------|----------|------------------|------|-----------------|------------------------|---------------------|------------|----------------|---------|---------------|
| 21 | SMRI: Array | 49  | F   | W    | 45       | 6.72             | 1435 | Cardiac         | None                   | None                | None       | Little or none | Yes     | Not available |
| 22 | SMRI: Array | 33  | F   | W    | 29       | 6.52             | 1360 | Asthma          | None                   | None                | social     | Little or none | Unknown | Not available |
| 23 | SMRI: Array | 48  | M   | W    | 31       | 6.86             | 1580 | Cardiac         | None                   | None                | None       | Little or none | Unknown | Not available |
| 24 | SMRI: Array | 50  | M   | W    | 49       | 6.75             | 1645 | Cardiac         | None                   | None                | None       | Little or none | Yes     | Not available |
| 25 | SMRI: Array | 32  | M   | W    | 13       | 6.57             | 1410 | Cardiac         | None                   | None                | None       | Little or none | Unknown | Not available |
| 26 | SMRI: Array | 47  | M   | W    | 11       | 6.6              | 1495 | Cardiac         | None                   | None                | social     | Little or none | No      | Not available |
| 27 | SMRI: Array | 46  | M   | W    | 31       | 6.67             | 1360 | Cardiac         | None                   | None                | None       | Little or none | Unknown | Not available |
| 28 | SMRI: Array | 40  | M   | W    | 38       | 6.67             | 1498 | Cardiac         | None                   | None                | None       | Little or none | Yes     | Not available |
| 29 | SMRI: Array | 51  | M   | W    | 22       | 6.71             | 1900 | Cardiac         | None                   | None                | None       | Little or none | Unknown | Not available |
| 30 | SMRI: Array | 31  | M   | W    | 11       | 6.13             | 1335 | Pulm Embol      | None                   | None                | social     | Little or none | Unknown | Not available |
| 31 | SMRI: Array | 48  | M   | W    | 24       | 6.91             | 1321 | Cardiac         | None                   | None                | social     | Little or none | Unknown | Not available |
| 32 | SMRI: Array | 39  | F   | W    | 58       | 6.46             | 1260 | Cardiac         | None                   | None                | None       | Heavy past     | Yes     | Not available |
| 33 | SMRI: Array | 47  | M   | W    | 36       | 6.57             | 1535 | Cardiac         | None                   | None                | None       | Little or none | No      | Not available |
| 34 | SMRI: Array | 41  | F   | W    | 50       | 6.17             | 1290 | Cardiac         | None                   | None                | None       | Little or none | No      | Not available |
| 35 | SMRI: D/S   | 34  | M   | W    | 9        | 6.56             | 1535 | MVA             | None                   | None                | None       | Little or none | yes     | Not available |
| 36 | SMRI: D/S   | 50  | M   | W    | 11       | 6.5              | 1530 | Cardiac         | None                   | None                | social     | Little or none | Unknown | Not available |
| 37 | SMRI: D/S   | 24  | M   | W    | 17       | 6.6              | 1595 | MVA             | None                   | None                | heavy past | Heavy past     | Unknown | Not available |
| 38 | SMRI: D/S   | 50  | F   | W    | 35       | 6.31             | 1520 | Cardiac         | Buspirone              | None                | None       | Little or none | Yes     | Not available |
| 39 | SMRI: D/S   | 39  | F   | W    | 24       | 6.88             | 1200 | Cardiac         | None                   | None                | None       | Little or none | Unknown | Not available |
| 40 | SMRI: D/S   | 56  | F   | W    | 29       | 6.78             | 1278 | Cardiac         | None                   | None                | None       | Little or none | No      | Not available |
| 41 | SMRI: D/S   | 48  | M   | H    | 12       | 6.51             | 1410 | Cardiac         | None                   | None                | social     | Heavy past     | No      | Not available |

(Continued)

Supplementary Table 1. (continued)

| #  | Co-hort   | Age | Sex | Race | PMI (hr) | Brain Weight (g) | pH   | COD            | Presc. Antidep. | Prescr. Antipsychotics | Other Prescr. Drugs | Drug abuse | Alcohol use      | Smoking | Toxicology                         |
|----|-----------|-----|-----|------|----------|------------------|------|----------------|-----------------|------------------------|---------------------|------------|------------------|---------|------------------------------------|
| 42 | SMRI: D/S | 35  | M   | W    | 31       | 1520             | 6.59 | MVA            | None            | None                   | None                | None       | Moderate present | Yes     | Not available                      |
| 43 | SMRI: D/S | 63  | M   | W    | 40       | 1410             | 6.91 | Cardiac        | None            | None                   | None                | None       | Heavy past       | No      | Not available                      |
| 44 | SMRI: D/S | 56  | F   | W    | 31       | 1400             | 6.66 | Obesity        | None            | None                   | None                | None       | Heavy past       | Yes     | Not available                      |
| 45 | SMRI: D/S | 63  | M   | W    | 37       | 1530             | 6.5  | Cardiac        | None            | None                   | None                | None       | Little or none   | Unknown | Not available                      |
| 46 | MBC       | 72  | F   | W    | 17       | 1090             | N/A  | MVA            | None            | None                   | Unknown             | None       | Little or none   | No      | salicylate                         |
| 47 | MBC       | 16  | M   | W    | 20       | 1650             | 6.89 | MVA            | None            | None                   | None                | None       | Little or none   | No      | OTC cold meds                      |
| 48 | MBC       | 35  | M   | W    | 16       | 1360             | 6.44 | Cardiac        | None            | None                   | None                | None       | Little or none   | No      | None                               |
| 49 | MBC       | 50  | M   | W    | 22       | 1450             | 6.38 | Cardiac        | None            | None                   | None                | None       | Little or none   | No      | None                               |
| 50 | MBC       | 50  | F   | W    | 12       | 1500             | 6.58 | Cardiac        | None            | None                   | Unknown             | None       | Little or none   | Yes     | codeine, cyclobenzaprine, atropine |
| 51 | MBC       | 50  | F   | B    | >24      | 1100             | 6.72 | Cardiac        | None            | None                   | None                | None       | Dependence       | No      | None                               |
| 52 | MBC       | 46  | M   | W    | 24       | 1850             | 6.64 | Cardiac        | Unknown         | None                   | None                | None       | Little or none   | No      | citalopram                         |
| 53 | MBC       | 56  | M   | W    | 24       | 1450             | 6.47 | Drown: Accid   | None            | None                   | None                | None       | Little or none   | No      | None                               |
| 54 | MBC       | 60  | M   | W    | 15       | 1480             | 6.98 | Drown: Accid   | None            | None                   | None                | None       | Little or none   | No      | None                               |
| 55 | MBC       | 45  | F   | W    | 16       | 1245             | 6.69 | Cardiac        | None            | None                   | None                | None       | Abuse            | No      | None                               |
| 56 | MBC       | 77  | M   | W    | 16       | 1700             | 6.80 | Cardiac/ Drown | None            | None                   | None                | None       | Little or none   | No      | None                               |

  

| #                   | Co-hort   | Age | Sex | Race | PMI (hr) | Brain Weight (g) | pH   | COD        | Presc. Antidep.         | Prescr. Antipsych | Other Prescr. Drugs | Drug abuse    | Alcohol use    | Smoking | Toxicology    |
|---------------------|-----------|-----|-----|------|----------|------------------|------|------------|-------------------------|-------------------|---------------------|---------------|----------------|---------|---------------|
| MDD WITHOUT SUICIDE |           |     |     |      |          |                  |      |            |                         |                   |                     |               |                |         |               |
| 1                   | SMRI: D/S | 53  | M   | W    | 21       | 1520             | 6.64 | Cardiac    | None                    | None              | None                | moderate past | Little or none | Unknown | Not available |
| 2                   | SMRI: D/S | 36  | F   | W    | 32       | 1270             | 6.74 | Pulm Embol | Trazodone, Mirtazapine  | Risperidone       | None                | None          | Little or none | yes     | Not available |
| 3                   | SMRI: D/S | 56  | F   | W    | 15       | 1370             | 6.59 | Burns      | Antidep. type uncertain | None              | None                | heavy past    | Little or none | No      | Not available |
| 4                   | SMRI: D/S | 43  | M   | W    | 30       | 1500             | 6.65 | Pneumonia  | Buspirone, Sertraline   | Quetiapine        | None                | None          | Heavy present  | Yes     | Not available |
| 5                   | SMRI: D/S | 39  | M   | W    | 16       | 1570             | 6.6  | Cardiac    | None                    | None              | None                | None          | Little or none | Yes     | Not available |
| 6                   | SMRI: D/S | 55  | M   | W    | 43       | 1675             | 6.62 | Cardiac    | Fluoxetine              | None              | None                | None          | Heavy present  | Unknown | Not available |
| 7                   | SMRI: D/S | 44  | M   | W    | 24       | 1550             | 6.52 | Cardiac    | Bupropion, Paroxetine   | Chlorpromazine    | None                | None          | Little or none | Unknown | Not available |
| 8                   | SMRI: D/S | 37  | F   | W    | 32       | 1490             | 6.64 | Cardiac    | Fluoxetine              | None              | None                | moderate past | Little or none | No      | Not available |

(Continued)

Supplementary Table 1. (continued)

| #  | Co-hort   | Age | Sex | Race | PMI (hr) | pH   | Brain Weight (g) | COD                              | Presc. Antidep.            | Prescr. Antipsychotics | Other Prescr. Drugs                          |                                           | Alcohol use    | Smoking | Toxicology                                               |
|----|-----------|-----|-----|------|----------|------|------------------|----------------------------------|----------------------------|------------------------|----------------------------------------------|-------------------------------------------|----------------|---------|----------------------------------------------------------|
|    |           |     |     |      |          |      |                  |                                  |                            |                        | Drugs                                        | Drugs                                     |                |         |                                                          |
| 9  | SMRI: D/S | 45  | F   | W    | 29       | 6.9  | 1350             | Cardiac                          | Sertraline                 | None                   | None                                         | None                                      | Little or none | Unknown | Not available                                            |
| 10 | SMRI: D/S | 49  | M   | W    | 86       | 6.68 | 1601             | Cardiac                          | Venlafaxine, Amitriptyline | None                   | None                                         | heavy present                             | Heavy present  | Yes     | Not available                                            |
| 11 | SMRI: D/S | 36  | M   | W    | 31       | 6.6  | 1540             | Cardiac                          | Sertraline                 | None                   | None                                         | social                                    | Little or none | Unknown | Not available                                            |
| 12 | MBC       | 65  | M   | W    | 14       | N/A  | 1250             | Cardiac                          | Sertraline                 | None                   | None                                         | None                                      | Little or none | No      | None                                                     |
| 13 | MBC       | 55  | F   | B    | 8        | N/A  | 1285             | Cardiac                          | Fluoxetine, Perphenazine   | None                   | None                                         | None                                      | Abuse          | No      | Acetone, fluoxetine                                      |
| 14 | MBC       | 74  | F   | B    | 7        | 7.01 | 1150             | Cardiac                          | Paroxetine, Thioridazine   | Thioridazine           | None                                         | None                                      | Little or none | No      | Paroxetine, thioridazine                                 |
| 15 | MBC       | 16  | M   | W    | 9        | N/A  | 1600             | narcotic intoxication            | Paroxetine                 | None                   | None                                         | Opioid dependence                         | Little or none | No      | Morphine, codeine, paroxetine, acetaminophen             |
| 16 | MBC       | 14  | M   | W    | 11       | N/A  | 1260             | MVA                              | Sertraline                 | None                   | None                                         | None                                      | Little or none | No      | Sertraline                                               |
| 17 | MBC       | 39  | M   | W    | 36       | N/A  | 1635             | Fatty Liver                      | None                       | Risperidone            | None                                         | None                                      | Little or none | No      | Thioridazine                                             |
| 18 | MBC       | 46  | M   | B    | 20       | 6.71 | N/A              | Seizure disorder                 | Fluoxetine                 | Risperidone            | None                                         | None                                      | Little or none | No      | Fluoxetine                                               |
| 19 | MBC       | 59  | M   | W    | 20       | 6.1  | 1300             | Cardiac                          | Sertraline 1 week          | None                   | None                                         | None                                      | Dependence     | Yes     | Methadone, sertraline, atropine                          |
| 20 | MBC       | 46  | F   | W    | 23       | 7.05 | 1400             | Cardiac/ mixed drug intoxication | Bupropion                  | Quetiapine             | Gabapentin, Lithium, Lamotrigine, Clonazepam | Cocaine, opioid, hallucinogen abuse (mod) | Abuse          | No      | Wellbutrin, diphenhydramine, lamictal                    |
| 21 | MBC       | 29  | F   | W    | 22       | 6.35 | 1300             | Obesity/ Cardiac                 | Unknown                    | Unknown                | None                                         | None                                      | Little or none | No      | Fluoxetine, norfluoxetine, propoxyphene, norpropoxyphene |

  

| #                | Co-hort   | Age | Sex | Race | PMI (hr) | pH   | Brain Weight (g) | COD        | Presc. Antidep. | Prescr. Antipsych | Other Prescr. Drugs |                  | Alcohol use    | Smo-king | Toxicology    |
|------------------|-----------|-----|-----|------|----------|------|------------------|------------|-----------------|-------------------|---------------------|------------------|----------------|----------|---------------|
|                  |           |     |     |      |          |      |                  |            |                 |                   | Drugs               | Drugs            |                |          |               |
| MDD WITH SUICIDE |           |     |     |      |          |      |                  |            |                 |                   |                     |                  |                |          |               |
| 1                | SMRI: D/S | 45  | M   | W    | 29       | 6.75 | 1514             | Suic: Hung | Trazodone       | None              | None                | None             | Moderate past  | No       | Not available |
| 2                | SMRI: D/S | 24  | M   | W    | 21       | 6.61 | 1737             | Suic: OD   | Venlafaxine     | None              | None                | None             | Unknown        | Yes      | Not available |
| 3                | SMRI: D/S | 45  | F   | W    | 13       | 6.58 | 1170             | Suic: OD   | Bupropion       | Quetiapine        | None                | moderate present | Heavy past     | Unknown  | Not available |
| 4                | SMRI: D/S | 48  | F   | W    | 24       | 6.36 | 1330             | Suic: OD   | Desipramine     | Thiothixene       | None                | None             | Little or none | Yes      | Not available |

(Continued)

**Supplemental Table 1. (continued)**

| #  | Co-hort   | Age | Sex | Race | PMI (hr) | Brain Weight (g) | COD                                  | Presc. Antidep.        | Prescr. Antipsychotics | Other Prescr. Drugs | Drug abuse             | Alcohol use      | Smoking | Toxicology                                                                                 |
|----|-----------|-----|-----|------|----------|------------------|--------------------------------------|------------------------|------------------------|---------------------|------------------------|------------------|---------|--------------------------------------------------------------------------------------------|
| 5  | SMRI: D/S | 33  | M   | W    | 25       | 6.86             | Suic: Hung                           | None                   | None                   | None                | moderate past          | Little or none   | Unknown | Not available                                                                              |
| 6  | SMRI: D/S | 56  | M   | W    | 38       | 6.59             | Suic: OD                             | Venlafaxine, Bupropion | Risperidone            | None                | None                   | Moderate present | No      | Not available                                                                              |
| 7  | SMRI: D/S | 32  | F   | W    | 19       | 6.8              | Suic: Hung                           | Trazodone, Paroxetine  | None                   | None                | None                   | Little or none   | Unknown | Not available                                                                              |
| 8  | SMRI: D/S | 34  | M   | W    | 24       | 6.79             | Suic: Jump                           | Fluoxetine             | None                   | None                | None                   | Heavy present    | Unknown | Not available                                                                              |
| 9  | SMRI: D/S | 47  | F   | W    | 25       | 6.88             | Suic: GSW                            | Bupropion              | None                   | None                | None                   | Little or none   | No      | Not available                                                                              |
| 10 | SMRI: D/S | 35  | M   | H    | 19       | 6.6              | Suic: Hung                           | None                   | None                   | None                | None                   | Little or none   | Unknown | Not available                                                                              |
| 11 | SMRI: D/S | 62  | M   | W    | 65       | 6.57             | Suic: Stab                           | Nefazodone             | None                   | None                | None                   | Heavy present    | Unknown | Not available                                                                              |
| 12 | MBC       | 43  | M   | W    | 20       | 6.31             | Suic: Hung                           | Unknown                | Unknown                | None                | None                   | Little or none   | No      | None                                                                                       |
| 13 | MBC       | 22  | F   | W    | 20       | 6.66             | Suic: drug & ETOH intoxication       | Unknown                | Unknown                | None                | None                   | Little or none   | No      | Diphenhydramine, codeine                                                                   |
| 14 | MBC       | 49  | M   | W    | 17       | N/A              | Suic: Stab                           | Nortriptyline          | None                   | None                | None                   | Little or none   | No      | Tramadol, nortriptyline                                                                    |
| 15 | MBC       | 18  | M   | W    | 19       | N/A              | Suic: Hung                           | Unknown                | Unknown                | None                | None                   | Little or none   | No      | None                                                                                       |
| 16 | MBC       | 44  | F   | W    | 30       | N/A              | Suic: drug & ETOH intoxication       | Fluoxetine             | None                   | None                | opioid abuse           | Abuse            | Yes     | Fluoxetine, morphine,                                                                      |
| 17 | MBC       | 17  | M   | W    | 23       | 6.66             | Suic: Hung                           | Unknown                | Unknown                | None                | None                   | Abuse            | Yes     | None                                                                                       |
| 18 | MBC       | 63  | M   | W    | 19       | 6.84             | Suic: ETOH & meperidine intoxication | Fluoxetine             | None                   | None                | cannabis use           | Little or none   | No      | Meperidine, prozac, diazepam                                                               |
| 19 | MBC       | 50  | F   | W    | 24       | 6.44             | Suic: Hung                           | Excitalopram           | Olanzapine             | None                | None                   | Abuse            | No      | None                                                                                       |
| 20 | MBC       | 67  | M   | W    | 22       | 6.46             | Suic: GSW                            | Unknown                | None                   | None                | None                   | Little or none   | Yes     | Prozac, effexor                                                                            |
| 21 | MBC       | 79  | M   | W    | 23       | 6.98             | Suic: Stab                           | Unknown                | Unknown                | None                | None                   | Dependence       | No      | Citalopram, diphendramine, doxylamine, acetaminophen, pseudoephedrine, phenylpropanolamine |
| 22 | MBC       | 30  | M   | W    | 24       | 6.53             | Suic: Hung                           | Unknown                | Unknown                | None                | None                   | Little or none   | No      | None                                                                                       |
| 23 | MBC       | 40  | F   | W    | 20       | 6.51             | Suic: OD (medication overdose)       | Bupropion, Venlafaxine | None                   | None                | alprazolam, clonazepam | Little or none   | No      | Acetaminophen, diphenhydramine, xanax                                                      |
| 24 | MBC       | 53  | M   | W    | >24      | 6.6              | Suic: Stab                           | Sertraline             | None                   | Lisinopril          | None                   | Little or none   | No      | Desmethylertraline                                                                         |

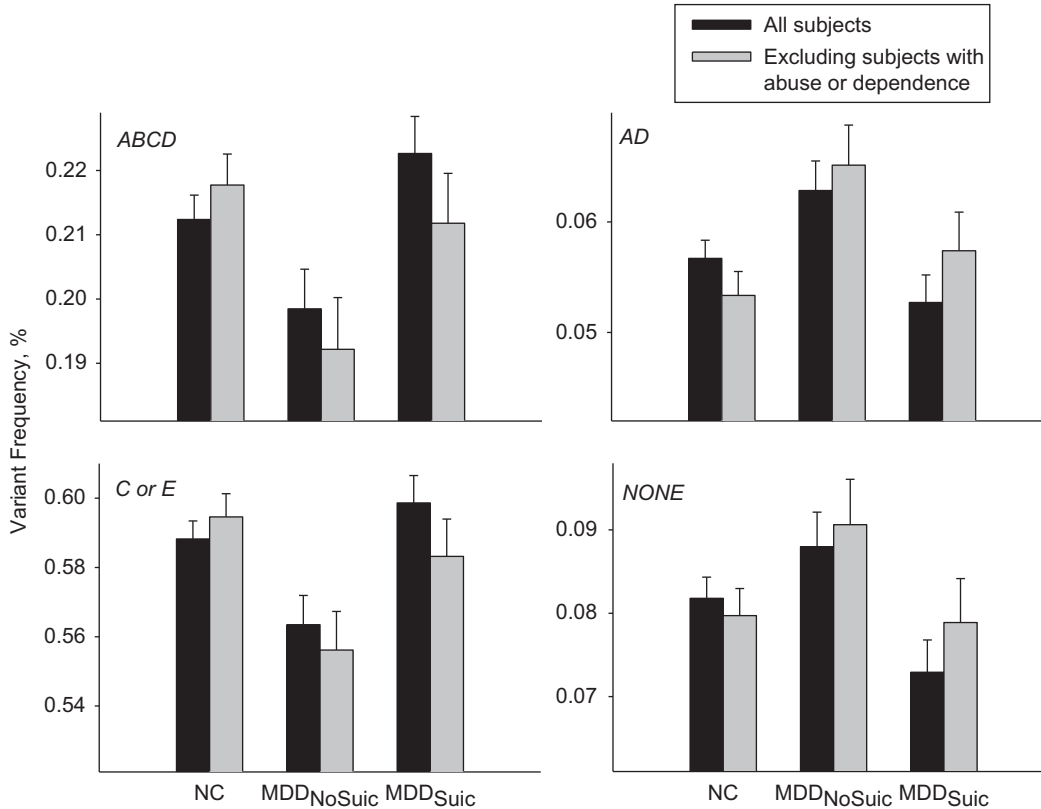

Supplemental Figure 2. Frequencies of the 5-HT<sub>2C</sub>-R editing transcripts in all subjects and excluding subjects with evidence of substance abuse or dependence. All subjects: NC, N = 56; MDD<sub>NoSuic</sub>, N = 21; MDD<sub>Suic</sub>, N = 24. Excluding subjects with abuse or dependence: NC, N = 48; MDD<sub>NoSuic</sub>, N = 12; MDD<sub>Suic</sub>, N = 16. Shown are Means  $\pm$  SEM. Although the smaller sample size reduced statistical significance, the pattern and magnitude of the differences among groups after excluding subjects with abuse and dependence were similar to those in all subjects.

35 cycles of 15 sec at 95° C, 30 sec at 60° C, and 30 sec at 72° C. A standard cycle was applied for amplification of the ADAR and ECG transcripts.

The relative expression levels of the target transcripts and the ECGs were determined using the Relative Standard Curve Method (see Guide to Performing Relative Quantitation of Gene Expression Using Real-Time Quantitative PCR, Applied Biosystems). This method provides accurate quantitative results by accounting for differences in the efficiencies between target and ECG amplifications. Standard curves were generated by the association between threshold cycle (Ct) values and different quantities of a “calibrator” cDNA, which was prepared by mixing small quantities of all experimental samples. The relative amounts of the target and the ECG transcripts were calculated in each sample using the linear equations of the standard curves. Normalization procedure was determined using geNorm software (Vandesompele et al. 2002). The analysis revealed comparable gene stability measures (M) for all five ECG in the entire cohort and the pairwise variation comparison determined that including all five control genes was advantageous for optimal normalization (Vandesompele et al. 2002).

Therefore, the relative mRNA expression of the target transcripts was computed as the ratio between the amount of the target transcripts and the geometric mean of the amounts of all five ECGs.

*5-HT<sub>2C</sub>-R expression:* In addition to a regular 5' splice site (sp2), 5-HT<sub>2C</sub>-R pre-mRNA undergoes alternative splicing between exons 5 and 6 with two alternative splice sites described—sp1 and sp3 (Canton et al. 1996; Flomen et al. 2004). While the mRNA variant generated from splicing at sp2 is translated into a functional receptor, both of the resulting alternative splice variants are translated into truncated proteins that are unlikely to retain adequate receptor function. The splicing at the sp3 site was found to be extremely rare in the DLPFC (Dracheva et al. 2003). Therefore, two different custom-designed TaqMan assays were employed to distinguish between 5-HT<sub>2C</sub>Rsp1 and 5-HT<sub>2C</sub>Rsp2 variants (see Supplemental Table 3). In the 5-HT<sub>2C</sub>Rsp2 assay, the forward primer and the TaqMan probe were situated inside the 95-bp region that contains all five editing sites and is present in 5-HT<sub>2C</sub>Rsp2, but is deleted in 5-HT<sub>2C</sub>Rsp1; therefore, only 5-HT<sub>2C</sub>Rsp2 was amplified.



Supplemental Table 2. Efficiency of editing at the five editing sites of the 5-HT<sub>2C</sub>R mRNA. Shown are Means±SEM.

| Editing Site | NC (N = 56)  | MDD <sub>NoSuic</sub> (N = 21) | MDD <sub>Suic</sub> (N = 24) |
|--------------|--------------|--------------------------------|------------------------------|
| <b>A</b>     | 78.26 ± 0.44 | 77.09 ± 1.15                   | 79.06 ± 0.68                 |
| <b>B</b>     | 52.02 ± 0.66 | 50.11 ± 1.58                   | 52.51 ± 0.98                 |
| <b>E</b>     | 18.81 ± 0.27 | 17.66 ± 0.55                   | 18.89 ± 0.34                 |
| <b>C</b>     | 53.64 ± 0.54 | 51.55 ± 1.09                   | 54.83 ± 0.57                 |
| <b>D</b>     | 62.98 ± 0.44 | 61.83 ± 0.96                   | 62.62 ± 1.09                 |

*Analysis of ADARs' mRNA expression:*

**ADAR1:** Five different splice variants of ADAR1 gene (*ADAR*), which originate from 3 transcription initiation sites and several alternative splicing events, are reported by the NCBI (accession #: NM\_001111.4, NM\_015840.3, NM\_015841.3, NM\_001025107.2, and NM\_00193495.1; Supplemental Figure 1). Each of these transcripts encodes a protein isoform that possesses three double-stranded RNA binding domains (RBDI, RBDII, and RBDIII), a catalytic domain, and one or two

Z-DNA-binding domains. The RNA transcripts differ in three regions: alternative exons 1-3 in 5' region, exon 8, and exon 9 (see Supplemental Figure 1). The longest transcript (variant 1) encodes the longest protein isoform and is recognized as the canonical sequence. Variants 2 and 3 use a different in-frame splice site in exon 9, and their respective proteins have a 26 amino acid (AA) deletion between the third RBD and the catalytic domain. Compared to variant 2, variant 3 uses an alternative in-frame splice site at exon 8, thus resulting in a protein isoform with a 19 AA deletion between RBDII and RBDIII. Variants 4 and 5 have different 5' UTRs (compared to 1-3 and to each other), but encode identical proteins. Compared to protein isoforms 1-3, this protein is translated from a downstream start codon and has a significantly shorter N-terminus, which lacks the nuclear export signal and therefore only found in the nucleus. In addition, it has been demonstrated that transcripts 1-3 (and their corresponding proteins) are interferon inducible, while transcripts 4 & 5 are constitutively expressed (Strehblow et al. 2002).

Supplementary Table 3. Description of the TaqMan assays used in the study. Both pre-designed assays (Applied Biosystems) and custom assays, designed using Primer Express (Invitrogen) were employed.

| Gene                      | Variants measured | RefSeq                                                                           | Assay Position          | Assay Design: Forward (F) and Reverse (R) Primer and Probe <sup>§</sup>             | Included in study* |
|---------------------------|-------------------|----------------------------------------------------------------------------------|-------------------------|-------------------------------------------------------------------------------------|--------------------|
| <b>5-HT<sub>2C</sub>R</b> | sp2               | NM_000868.2                                                                      | Exon 5, 6               | F- CGTTTCAATTTCGCGGACTAAG<br>R-CACCTATAGAAATTGCCCAAACAA<br>Probe: CCATCATGAAGATTGC  | Yes                |
| <b>5-HT<sub>2C</sub>R</b> | sp1               | AK295753                                                                         | Exon 5 <sup>#</sup> , 6 | F- CGCTGGATCGGTGTATCAGTT<br>R- CGCACGTCGTGTTGTTTCAC<br>Probe: CTATCCCTGTGATTGGAC    | Yes                |
| <b>ADAR1</b>              | V1, 2, 4, 5       | NM_001111.4,<br>NM_015840.3,<br>NM_001025107.2,<br>NM_00193495.1                 | Exon 7, 8a              | F-GGCTTCTGATAACCAGCCTGAA<br>R-GGGCATCATGGATTCCAAGT<br>Probe: TATGATCTCAGAGTCACTTGA  | Yes                |
| <b>ADAR1</b>              | V3                | NM_015841.3                                                                      | Exon7, 8b               | Pre-designed Applied Biosystems<br>Hs01017600                                       | No                 |
| <b>ADAR1</b>              | V4                | NM_001025107.2                                                                   | Exon 1, 4               | Pre-designed Applied Biosystems<br>Hs01017596                                       | Yes                |
| <b>ADAR1</b>              | V1, 4, 5          | NM_001111.4,<br>NM_001025107.2,<br>NM_00193495.1                                 | Exon 9b, 10             | Pre-designed Applied Biosystems<br>Hs01020779                                       | Yes                |
| <b>ADAR1</b>              | V2, 3             | NM_015840.3,<br>NM_015841.3                                                      | Exon 9a, 10             | Pre-designed Applied Biosystems<br>Hs01017602                                       | Yes                |
| <b>ADAR1</b>              | V1, 2, 3, 4, 5    | NM_001111.4,<br>NM_015840.3,<br>NM_015841.3,<br>NM_001025107.2,<br>NM_00193495.1 | Exon 4, 5               | Pre-designed Applied Biosystems<br>Hs00241666                                       | Yes                |
| <b>ADAR2</b>              | V1, 4             | NM_001112.3,<br>NM_001160230.1                                                   | Exon 8, 10              | Pre-designed Applied Biosystems<br>Hs00955199                                       | Yes                |
| <b>ADAR2</b>              | V2, 3             | NM_015833.3,<br>NM_015834.3                                                      | Exon 9, 10              | F- CGATCCTTCCACCTCAACCTT<br>R- ATTTGGGTGTCTATCTGCTGGTT<br>Probe: CAAGGAGCTGGGACTACA | Yes                |

\*Assays that yielded Ct > 30 in the generic specimen were not analyzed (see Supplementary methods). <sup>§</sup>All TaqMan probes contained FAM and MGB. <sup>#</sup>Alternative splice site.

Supplementary Table 4. Interdependence of editing among different editing sites. (+) denotes an editing event (from A to I residue) and (-) denotes an absence of an editing event (a genomic A residue). Subscripts refer to the editing status of the context site, i.e.  $A^+_{B^+}$  is the ratio of  $A^+_{B^+}$  to  $(A^+_{B^+} + A^-_{B^+})$ , where edited B site is the context site. Shown is an analysis for the entire cohort (N = 101). The results demonstrate that editing at any of the five sites is dependent on editing at any other site (all t-values  $\geq 10.76$ , all p values  $< 0.000001$ , by paired Student t-test). \*Difference between editing frequencies at a site when the status of editing at another site is (+) or (-) (i.e.,  $X^+_{Y^+} - X^+_{Y^-}$ , where X and Y are any editing site).

|         |             | Frequency of Editing at a Site in the Context of Editing at Another Site, Mean $\pm$ SEM, % | * $\Delta$ , % |
|---------|-------------|---------------------------------------------------------------------------------------------|----------------|
| Pair 1  | $A^+_{B^+}$ | 93.63 $\pm$ 0.19                                                                            | 31.77          |
|         | $A^+_{B^-}$ | 61.86 $\pm$ 0.41                                                                            |                |
| Pair 2  | $B^+_{A^+}$ | 61.82 $\pm$ 0.47                                                                            | 46.55          |
|         | $B^+_{A^-}$ | 15.27 $\pm$ 0.38                                                                            |                |
| Pair 3  | $A^+_{E^+}$ | 88.35 $\pm$ 0.72                                                                            | 12.48          |
|         | $A^+_{E^-}$ | 75.87 $\pm$ 0.39                                                                            |                |
| Pair 4  | $E^+_{A^+}$ | 21.01 $\pm$ 0.27                                                                            | 11.39          |
|         | $E^+_{A^-}$ | 9.63 $\pm$ 0.33                                                                             |                |
| Pair 5  | $A^+_{C^+}$ | 87.43 $\pm$ 0.37                                                                            | 19.68          |
|         | $A^+_{C^-}$ | 67.74 $\pm$ 0.42                                                                            |                |
| Pair 6  | $C^+_{A^+}$ | 59.73 $\pm$ 0.37                                                                            | 29.08          |
|         | $C^+_{A^-}$ | 30.66 $\pm$ 0.60                                                                            |                |
| Pair 7  | $A^+_{D^+}$ | 87.90 $\pm$ 0.28                                                                            | 25.81          |
|         | $A^+_{D^-}$ | 62.09 $\pm$ 0.47                                                                            |                |
| Pair 8  | $D^+_{A^+}$ | 70.39 $\pm$ 0.32                                                                            | 35.56          |
|         | $D^+_{A^-}$ | 34.83 $\pm$ 0.46                                                                            |                |
| Pair 9  | $B^+_{E^+}$ | 38.30 $\pm$ 0.76                                                                            | -16.49         |
|         | $B^+_{E^-}$ | 54.79 $\pm$ 0.57                                                                            |                |
| Pair 10 | $E^+_{B^+}$ | 13.78 $\pm$ 0.29                                                                            | -10.02         |
|         | $E^+_{B^-}$ | 23.79 $\pm$ 0.30                                                                            |                |
| Pair 11 | $B^+_{C^+}$ | 57.66 $\pm$ 0.50                                                                            | 12.64          |
|         | $B^+_{C^-}$ | 45.02 $\pm$ 0.63                                                                            |                |
| Pair 12 | $C^+_{B^+}$ | 59.68 $\pm$ 0.42                                                                            | 12.66          |
|         | $C^+_{B^-}$ | 47.02 $\pm$ 0.46                                                                            |                |
| Pair 13 | $B^+_{D^+}$ | 65.73 $\pm$ 0.56                                                                            | 37.37          |
|         | $B^+_{D^-}$ | 28.36 $\pm$ 0.47                                                                            |                |
| Pair 14 | $D^+_{B^+}$ | 79.66 $\pm$ 0.31                                                                            | 35.18          |
|         | $D^+_{B^-}$ | 44.49 $\pm$ 0.46                                                                            |                |
| Pair 15 | $C^+_{E^+}$ | 72.55 $\pm$ 0.57                                                                            | 23.4           |
|         | $C^+_{E^-}$ | 49.15 $\pm$ 0.40                                                                            |                |
| Pair 16 | $E^+_{C^+}$ | 25.20 $\pm$ 0.28                                                                            | 14.26          |
|         | $E^+_{C^-}$ | 10.94 $\pm$ 0.22                                                                            |                |
| Pair 17 | $C^+_{D^+}$ | 58.25 $\pm$ 0.48                                                                            | 12.58          |
|         | $C^+_{D^-}$ | 45.67 $\pm$ 0.41                                                                            |                |
| Pair 18 | $D^+_{C^+}$ | 68.16 $\pm$ 0.34                                                                            | 11.86          |
|         | $D^+_{C^-}$ | 56.29 $\pm$ 0.55                                                                            |                |
| Pair 19 | $D^+_{E^+}$ | 57.27 $\pm$ 0.74                                                                            | -6.59          |
|         | $D^+_{E^-}$ | 63.86 $\pm$ 0.39                                                                            |                |
| Pair 20 | $E^+_{D^+}$ | 16.99 $\pm$ 0.27                                                                            | -4.2           |
|         | $E^+_{D^-}$ | 21.19 $\pm$ 0.30                                                                            |                |

**ADAR2:** Seven different transcript variants of ADAR2 (*ADARB1*) are reported by NCBI, but only five of them are linked to corresponding proteins (accession #s: NM\_001112.3, NM\_015833.3, NM\_015834.3, NM\_001160230.1; Supplementary Fig. 1). Each of

the protein isoforms contains two dRBDs and a C-terminal catalytic domain. The transcripts originate from alternative splicing of exon 9, which represents an Alu cassette, and exon 13, which encodes the catalytic domain. Compared to variants 3&4, variants 1&2 possess a longer 3' exon, and, therefore, encode proteins with a longer C-terminus. Variants 1&2 differ from each other by inclusion of exon 9 in variant 2, while variants 3&4 differ from each other by inclusion of exon 9 in variant 3. ADAR2 lacks the homologous N-terminal nuclear export signal found in ADAR1 and, therefore, is confined to the nucleus (Desterro et al. 2003).

Because, of the large distances between different ADARs' transcription initiation and splicing sites, it is unachievable to generate qPCR assays for each individual transcript. Thus, we attempted to achieve a complete analysis of the ADARs transcription, by using a number of pre-designed (Applied Biosystems) and custom TaqMan assays (Supplemental Table 3). The custom assays were designed using Primer Express software (Invitrogen). Each assay was tested using generic cDNA. Those with late appearances [threshold cycle (Ct)  $> 30$  at threshold of 0.2], which is indicative of low expression, were excluded from analysis (Supplemental Table 3).

## Literature Cited

- Canton H, Emeson RB, Barker EL, Backstrom JR, Lu JT, Chang MS, et al. 1996. Identification, molecular cloning, and distribution of a short variant of the 5-hydroxytryptamine2C receptor produced by alternative splicing. *Mol Pharmacol* 50:799-807.
- Desterro JM, Keegan LP, Lafarga M, Berciano MT, O'Connell M, Carmo-Fonseca M. 2003. Dynamic association of RNA-editing enzymes with the nucleolus. *J Cell Sci* 116:1805-1818.
- Dracheva S, Chin B, Haroutunian V. 2008. Altered Serotonin 2C Receptor RNA Splicing in Suicide: Association with Editing. *NeuroReport* 19:379-382.
- Dracheva S, Elhakem SL, Marcus SM, Siever LJ, McGurk SR, Haroutunian V. 2003. RNA editing and alternative splicing of human serotonin 2C receptor in schizophrenia. *J Neurochem* 87:1402-1412.
- Dracheva S, Lyddon R, Barley K, Marcus SM, Hurd YL, Byne WM. 2009. Editing of Serotonin 2C Receptor mRNA in the Prefrontal Cortex Characterizes High-Novelty Locomotor Response Behavioral Trait. *Neuropsychopharmacology* 34:2237-2251.
- Flomen R, Knight J, Sham P, Kerwin R, Makoff A. 2004. Evidence that RNA editing modulates splice site selection in the 5-HT2C receptor gene. *Nucleic Acids Res* 32:2113-2122.
- Strehblow A, Hallegger M, Jantsch MF. 2002. Nucleocytoplasmic distribution of human RNA-editing enzyme ADAR1 is modulated by double-stranded RNA-binding domains, a leucine-rich export signal, and a putative dimerization domain. *Mol Biol Cell* 13:3822-3835.
- Vandesompele J, De Preter K, Pattyn F, Poppe B, Van Roy N, De Paepe A, et al. 2002. Accurate normalization of real-time quantitative RT-PCR data by geometric averaging of multiple internal control genes. *Genome Biol* 3:RESEARCH0034.

Supplementary Table 5. Analysis of ADARs mRNA expression by ANCOVA. Comparison among three study groups ( $MDD_{NoSuic}$ ,  $MDD_{Suic}$ , and NC) is presented; PMI and age were used as covariates. The expression was assessed using several TaqMan assays (see Supplemental Methods). The expression of target transcripts was normalized to geometric mean of five endogenous controls (*B2M*, *GUSB*, *PPIA*, *RPLPO*, *HPRT1*). Shown are Mean  $\pm$  SEM of relative expression values. Significant differences ( $p < 0.05$ ) are **bolded**.

| Assay                    | Relative mRNA Expression<br>NC (N = 55) | Relative mRNA Expression<br>$MDD_{NoSuic}$ (N = 24) | Relative mRNA Expression<br>$MDD_{Suic}$ (N = 21) | Groups                                  | p (Tukey-Kramer Adjusted) |
|--------------------------|-----------------------------------------|-----------------------------------------------------|---------------------------------------------------|-----------------------------------------|---------------------------|
| <b>ADAR1 V1, 2, 4, 5</b> | <b>1.0139 <math>\pm</math> 0.01</b>     | <b>0.9566 <math>\pm</math> 0.02</b>                 | <b>0.9718 <math>\pm</math> 0.02</b>               | <b><math>MDD_{NoSuic}</math> vs. NC</b> | <b>0.0355</b>             |
|                          |                                         |                                                     |                                                   | $MDD_{Suic}$ vs. NC                     | 0.1350                    |
|                          |                                         |                                                     |                                                   | $MDD_{Suic}$ vs. $MDD_{NoSuic}$         | 0.8343                    |
| ADAR1 V1, 4, 5           | 0.94 $\pm$ 0.02                         | 0.93 $\pm$ 0.02                                     | 0.91 $\pm$ 0.02                                   | $MDD_{NoSuic}$ vs. NC                   | 0.9998                    |
|                          |                                         |                                                     |                                                   | $MDD_{Suic}$ vs. NC                     | 0.6113                    |
|                          |                                         |                                                     |                                                   | $MDD_{Suic}$ vs. $MDD_{NoSuic}$         | 0.7273                    |
| ADAR1 V2, 3              | 1.03 $\pm$ 0.03                         | 0.98 $\pm$ 0.05                                     | 0.96 $\pm$ 0.05                                   | $MDD_{NoSuic}$ vs. NC                   | 0.7084                    |
|                          |                                         |                                                     |                                                   | $MDD_{Suic}$ vs. NC                     | 0.5208                    |
|                          |                                         |                                                     |                                                   | $MDD_{Suic}$ vs. $MDD_{NoSuic}$         | 0.9742                    |
| ADAR1 V4, 5              | 1.05 $\pm$ 0.02                         | 1.09 $\pm$ 0.03                                     | 1.05 $\pm$ 0.03                                   | $MDD_{NoSuic}$ vs. NC                   | 0.6131                    |
|                          |                                         |                                                     |                                                   | $MDD_{Suic}$ vs. NC                     | 0.9997                    |
|                          |                                         |                                                     |                                                   | $MDD_{Suic}$ vs. $MDD_{NoSuic}$         | 0.6840                    |
| <b>ADAR2 V1, 4</b>       | <b>1.20 <math>\pm</math> 0.03</b>       | <b>0.97 <math>\pm</math> 0.05</b>                   | <b>1.02 <math>\pm</math> 0.05</b>                 | <b><math>MDD_{NoSuic}</math> vs. NC</b> | <b>0.0002</b>             |
|                          |                                         |                                                     |                                                   | <b><math>MDD_{Suic}</math> vs. NC</b>   | <b>0.0029</b>             |
|                          |                                         |                                                     |                                                   | $MDD_{Suic}$ vs. $MDD_{NoSuic}$         | 0.7288                    |
| <b>ADAR2 V2, 3</b>       | <b>1.17 <math>\pm</math> 0.03</b>       | <b>1.03 <math>\pm</math> 0.04</b>                   | <b>1.03 <math>\pm</math> 0.04</b>                 | <b><math>MDD_{NoSuic}</math> vs. NC</b> | <b>0.0086</b>             |
|                          |                                         |                                                     |                                                   | <b><math>MDD_{Suic}</math> vs. NC</b>   | <b>0.0057</b>             |
|                          |                                         |                                                     |                                                   | $MDD_{Suic}$ vs. $MDD_{NoSuic}$         | 1.0000                    |
